# Supplementary material for: Live Poultry Trading Drives China's H7N9 Viral Evolution and Geographical Network Propagation
Source: PubMed Central journal article supplement (PMC6094976; doi:10.3389/fpubh.2018.00210), 2018-07-27
Supplement: Data_Sheet_1.pdf [file Data_Sheet_1.pdf]

*Supplementary Material*

**Live Poultry Trading Drives China's H7N9 Viral Evolution and Geographical Network Propagation**

Ruiyun Li<sup>1,†</sup>, Tao Zhang<sup>2</sup>, Yuqi Bai<sup>2</sup>, Haochuan Li<sup>3</sup>, Yong Wang<sup>4</sup>, Yuhai Bi<sup>5</sup>, Jianyu Chang<sup>6\*</sup>, Bing Xu<sup>1,2\*</sup>

\* **Correspondence:** Bing Xu: bingxu@tsinghua.edu.cn; Jianyu Chang: changjianyu@cau.edu.cn

**1 Supplementary Figures and Tables**

**1.1 Supplementary Figures**

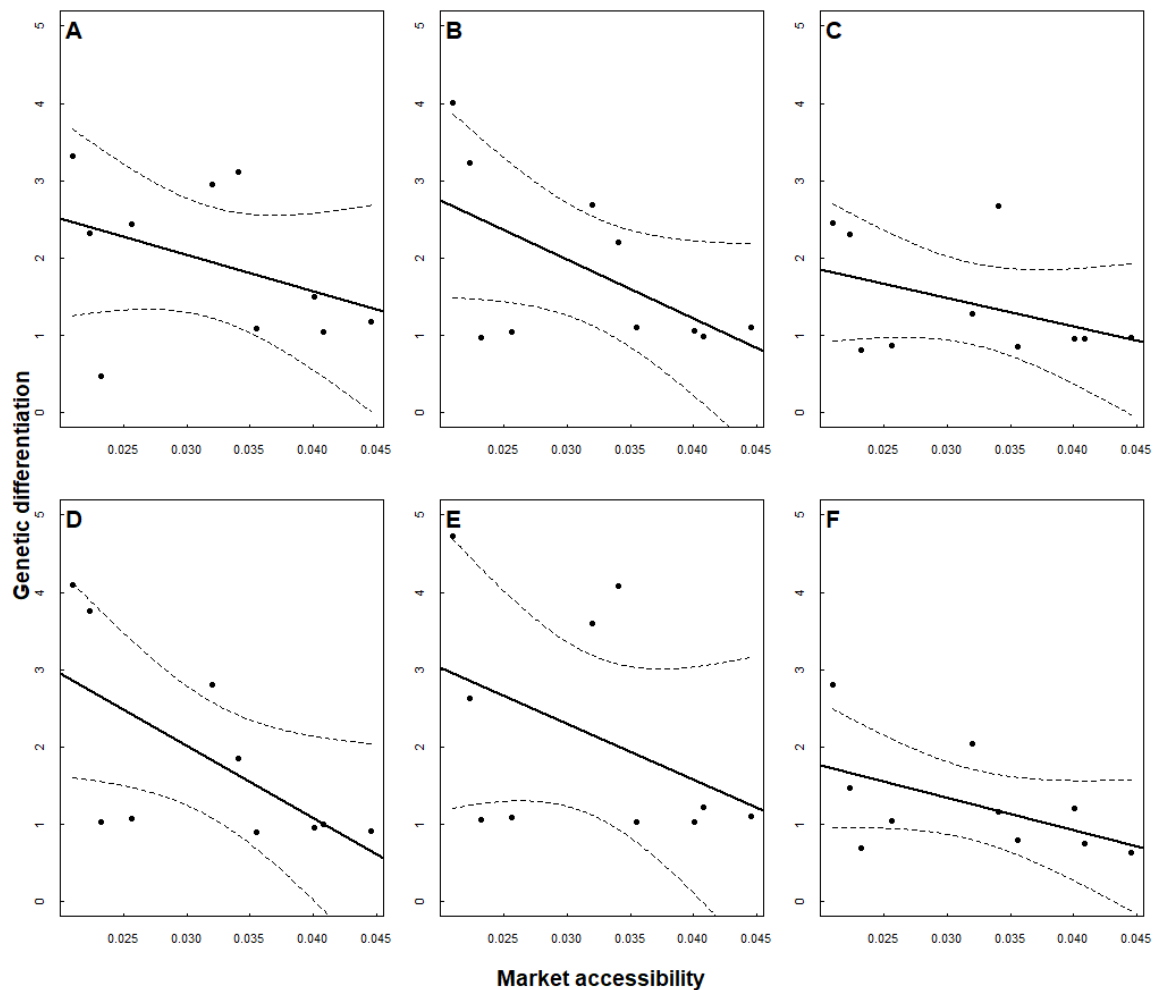

**Supplementary Figure 1.** Relationship between the level of genetic differentiation and market accessibility. For each internal gene segment—(A) PB2, (B) PB1, (C) PA, (D) NS, (E) NP and (F)

MP, the genetic differentiation level of the internal gene segments of H7N9 isolates was measured by  $F_{ST}$  index and then transformed into  $F_{ST}/(1-F_{ST})$  when plotted against the market accessibility. Linear regression and 95% confidence interval were indicated by solid and dot lines, respectively.

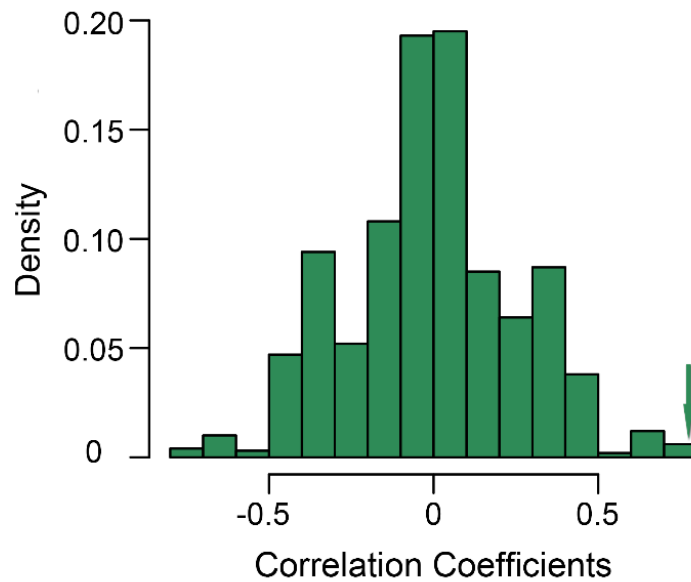

**Supplementary Figure 2.** Distribution of correlation coefficients for the randomly-generated networks. The histogram of correlation coefficients was constructed based on the 1,000 random networks, and the coefficients of viral migration and live poultry transportation network was indicated by the arrow.

## 1.2 Supplementary Tables

**Supplementary Table 1. Lineage distribution of H9N2 internal gene segments.** The similarity between H7N9 virus and H9N2 lineages was quantified by the average genetic distance. The H9N2 lineage shared the highest similarity with H7N9 virus was defined as the closest lineage. The presence of each H9N2 lineage were indicated by “+”; whereas those closest H9N2 lineages were highlighted by “++”.

| <b>Lineage</b> | <b>Representative virus</b>            | <b>PB2</b> | <b>PB1</b> | <b>PA</b> | <b>NS</b> | <b>NP</b> | <b>MP</b> |
|----------------|----------------------------------------|------------|------------|-----------|-----------|-----------|-----------|
| HK/G1/97       | <i>A/quail/Hongkong/G1/97</i>          | +          | +          | +         | +         | +         | ++        |
| BJ/1/94        | <i>A/chicken/Beijing/1/94</i>          | +          | +          | +         | ++        | +         | +         |
| HK/289/78      | <i>A/duck/Hongkong/289/78</i>          | +          | +          | +         | +         | +         | +         |
| HK/AF157/92    | <i>A/quail/Hongkong/AF157/92</i>       |            | +          |           | +         | +         | +         |
| SH/F/98        | <i>A/chicken/Shanghai/F/98</i>         | +          | ++         | ++        |           | ++        |           |
| ST/163/04      | <i>A/duck/Shantou/163/2004</i>         | ++         |            |           |           |           |           |
| ST/5663/01     | <i>A/quail/Shantou/5663/2001</i>       |            |            | +         |           |           |           |
| HK/Y439/97     | <i>A/duck/Hongkong/Y439/97</i>         |            |            | +         | +         | +         |           |
| KR/96323/96    | <i>A/chicken/Korea/38349-p96323/96</i> | +          | +          | +         | +         | +         | +         |
| Hok/49/98      | <i>A/duck/Hokkaido/49/98</i>           |            | +          | +         |           |           |           |
| IL/90658/00    | <i>A/chicken/Israel/90658/2000</i>     |            | +          |           | +         |           |           |
| DE/113/95      | <i>A/Duck/Germany/113/95</i>           | +          | +          | +         |           | +         | +         |
| PK/UDL-01/05   | <i>A/chicken/Pakistan/UDL-01/2005</i>  | +          |            |           |           |           |           |
| CA/189/66      | <i>A/turkey/California/189/66</i>      |            |            |           | +         |           |           |
| WI/1/66        | <i>A/turkey/Wisconsin/1/1966</i>       | +          | +          | +         | +         | +         | +         |

**Supplementary Table 2. Statistical performance of molecular evolutionary models.** Model comparison and selection was based on Bayes factor with different combination of molecular clock model (i.e., strict and relaxed clock model) and coalescent prior (i.e., Bayesian Skyline Plot (BSP), constant size and exponential growth).

| Molecular clock model | Coalescent prior | Estimated marginal likelihood | Bayes factors |          |             |         |          |             |
|-----------------------|------------------|-------------------------------|---------------|----------|-------------|---------|----------|-------------|
|                       |                  |                               | Strict        |          |             | Relaxed |          |             |
|                       |                  |                               | BSP           | Constant | Exponential | BSP     | Constant | Exponential |
|                       | BSP              | -6018.39                      | -             | -13.26   | 9.03        | -108.56 | -98.91   | -99.67      |
| Strict                | Constant         | -6005.13                      | 13.26         | -        | 22.28       | -95.30  | -85.65   | -86.41      |
|                       | Exponential      | -6027.42                      | -9.03         | -22.28   | -           | -117.58 | -107.94  | -108.69     |
| Relaxed               | BSP              | -5909.84                      | 108.56        | 95.30    | 117.58      | -       | 9.65     | 8.89        |
|                       | Constant         | -5919.48                      | 98.91         | 85.65    | 107.94      | -9.65   | -        | -0.76       |
|                       | Exponential      | -5918.73                      | 99.67         | 86.41    | 108.69      | -8.89   | 0.76     | -           |

**Supplementary Table 3.** The number of live poultry markets in each province searched with different keywords.

| Keywords            | Shanghai | Jiangsu | Zhejiang | Guangdong | Jiangxi |
|---------------------|----------|---------|----------|-----------|---------|
| Live poultry        | 1        | 1       | 1        | 0         | 1       |
| Agricultural market | 329      | 2236    | 1608     | 898       | 347     |
| Fresh market        | 5        | 7       | 0        | 4         | 8       |
| Live bird market    | 0        | 5       | 1        | 8         | 2       |
| <i>total</i>        | 335      | 2249    | 1610     | 910       | 358     |
